# Supplementary material for: Cathelicidin-3 Associated With Serum Extracellular Vesicles Enables Early Diagnosis of a Transmissible Cancer
Source: PubMed Central journal article supplement (PMC9004462; doi:10.3389/fimmu.2022.858423), 2022-03-29
Supplement: Presentation_1.pdf [file Presentation_1.pdf]

## ***Supplementary Material***

**Supplementary Tables** for *Cathelicidin-3 associated with serum extracellular vesicles enables early diagnosis of a transmissible cancer.*

This file contains Supplementary tables 2–4

**Supplementary table 2.** EV proteins accuracy for the diagnosis of DFT1 in the discovery cohort with an area under the curve (AUC)  $\geq 0.9$ . All numbers for AUC, sensitivity, specificity, and accuracy are in fractions. 95% confidence intervals.

| <b>Protein name</b> | <b>AUC</b>              | <b>Specificity</b>      | <b>Sensitivity</b>      | <b>Accuracy</b>         | <b>UniProt</b>    |
|---------------------|-------------------------|-------------------------|-------------------------|-------------------------|-------------------|
| <b>CATH3</b>        | 1.000<br>(1.000, 1.000) | 1.000<br>(1.000, 1.000) | 1.000<br>(1.000, 1.000) | 1.000<br>(1.000, 1.000) | G3W0S2            |
| <b>CTGF</b>         | 1.000<br>(1.000, 1.000) | 1.000<br>(1.000, 1.000) | 1.000<br>(1.000, 1.000) | 1.000<br>(1.000, 1.000) | G3WBU2            |
| <b>C5</b>           | 1.000<br>(1.000, 1.000) | 1.000<br>(1.000, 1.000) | 1.000<br>(1.000, 1.000) | 1.000<br>(1.000, 1.000) | G3WZ02            |
| <b>C8G</b>          | 0.992<br>(0.950, 1.000) | 1.000<br>(0.900, 1.000) | 0.917<br>(0.833, 1.000) | 0.955<br>(0.900, 1.000) | G3W1Q6            |
| <b>SPP2</b>         | 0.983<br>(0.925, 1.000) | 1.000<br>(0.900, 1.000) | 0.917<br>(0.833, 1.000) | 0.955<br>(0.900, 1.000) | G3VQP6            |
| <b>C6</b>           | 0.983<br>(0.925, 1.000) | 1.000<br>(0.800, 1.000) | 0.917<br>(0.833, 1.000) | 0.955<br>(0.909, 1.000) | G3WFL6            |
| <b>C7</b>           | 0.983<br>(0.925, 1.000) | 1.000<br>(0.800, 1.000) | 0.917<br>(0.833, 1.000) | 0.955<br>(0.909, 1.000) | G3WK50;<br>G3WK51 |
| <b>F10</b>          | 0.983<br>(0.925, 1.000) | 1.000<br>(0.800, 1.000) | 0.917<br>(0.833, 1.000) | 0.955<br>(0.908, 1.000) | G3WXN7            |
| <b>C8A</b>          | 0.975<br>(0.900, 1.000) | 1.000<br>(0.900, 1.000) | 0.917<br>(0.750, 1.000) | 0.955<br>(0.864, 1.000) | G3VVQ8;<br>G3VVQ9 |
| <b>ALDOA</b>        | 0.975<br>(0.900, 1.000) | 1.00<br>(0.800, 1.000)  | 0.833<br>(0.750, 1.000) | 0.900<br>(0.864, 1.000) | G3WAK9            |
| <b>C9</b>           | 0.967<br>(0.900, 1.000) | 1.000<br>(0.700, 1.000) | 0.833<br>(0.750, 1.000) | 0.909<br>(0.864, 1.000) | G3W3E7            |
| <b>ACTN1</b>        | 0.958<br>(0.867, 1.000) | 1.000<br>(0.800, 1.000) | 0.833<br>(0.750, 1.000) | 0.909<br>(0.810, 1.000) | G3WFU1;<br>G3WFU2 |
| <b>CPNE1</b>        | 0.958<br>(0.867, 1.000) | 0.800<br>(0.700, 1.000) | 1.000<br>(0.750, 1.000) | 0.909<br>(0.818, 1.000) | G3X2P2            |
| <b>PLEK</b>         | 0.950<br>(0.825, 1.000) | 1.000<br>(1.000, 1.000) | 0.917<br>(0.750, 1.000) | 0.955<br>(0.864, 1.000) | G3VJV4;<br>G3VJV5 |
| <b>VCP</b>          | 0.942<br>(0.817, 1.000) | 1.000<br>(0.900, 1.000) | 0.833<br>(0.667, 1.000) | 0.909<br>(0.818, 1.000) | G3WW22            |
| <b>IGA*</b>         | 0.933<br>(0.808, 1.000) | 0.800<br>(0.600, 1.00)  | 0.917<br>(0.667, 1.000) | 0.864<br>(0.773, 1.000) | G3VS26            |
| <b>BIN2</b>         | 0.925<br>(0.783, 1.000) | 0.900<br>(0.800, 1.000) | 0.917<br>(0.667, 1.000) | 0.909<br>(0.773, 1.000) | G3VUC7            |
| <b>LOC100931899</b> | 0.925<br>(0.792, 1.000) | 0.900<br>(0.700, 1.000) | 0.833<br>(0.583, 1.000) | 0.864<br>(0.773, 1.000) | G3VBX5            |
| <b>PFN1</b>         | 0.925<br>(0.792, 1.000) | 0.900<br>(0.700, 1.000) | 0.917<br>(0.667, 1.000) | 0.909<br>(0.773, 1.000) | G3VU42            |
| <b>YWHAZ</b>        | 0.925<br>(0.766, 1.000) | 0.900<br>(0.700, 1.000) | 1.000<br>(1.000, 1.000) | 0.955<br>(0.864, 1.000) | G3WHE0            |
| <b>TGFBI</b>        | 0.917<br>(0.767, 1.000) | 1.000<br>(0.700, 1.000) | 0.750<br>(0.583, 1.000) | 0.864<br>(0.773, 1.000) | G3VMG6            |
| <b>IGH*</b>         | 0.917<br>(0.775, 1.000) | 0.800<br>(0.600, 1.000) | 0.917<br>(0.583, 1.000) | 0.864<br>(0.773, 1.000) | G3VVK2            |
| <b>PTN</b>          | 0.908<br>(0.758, 1.000) | 1.000<br>(0.600, 1.000) | 0.750<br>(0.583, 1.000) | 0.864<br>(0.773, 1.000) | G3VRT4;<br>G3VRT5 |

|                     |                         |                         |                         |                         |                   |
|---------------------|-------------------------|-------------------------|-------------------------|-------------------------|-------------------|
| <b>ANXA11</b>       | 0.908<br>(0.767, 1.000) | 0.800<br>(0.600, 1.000) | 0.917<br>(0.583, 1.000) | 0.864<br>(0.773, 1.000) | G3VJ37;<br>G3VJ38 |
| <b>CAPZB</b>        | 0.908<br>(0.750, 1.000) | 0.900<br>(0.700, 1.000) | 0.917<br>(0.667, 1.000) | 0.909<br>(0.773, 1.000) | G3VTU6            |
| <b>LOC100924827</b> | 0.908<br>(0.767, 1.000) | 0.900<br>(0.600, 1.000) | 0.750<br>(0.583, 1.000) | 0.818<br>(0.773, 1.000) | G3VT38            |
| <b>TLN1</b>         | 0.908<br>(0.758, 1.000) | 0.900<br>(0.700, 1.000) | 0.833<br>(0.583, 1.000) | 0.864<br>(0.773, 1.000) | G3WN56            |
| <b>CAPZA2</b>       | 0.900<br>(0.750, 1.000) | 0.900<br>(0.600, 1.000) | 0.833<br>(0.583, 1.000) | 0.864<br>(0.773, 1.000) | G3WVH2;<br>G3WVH3 |
| <b>MPO</b>          | 0.900<br>(0.750, 1.000) | 1.000<br>(0.600, 1.000) | 0.750<br>(0.583, 1.000) | 0.864<br>(0.773, 1.000) | G3WE24            |
| <b>ANXA4</b>        | 0.908<br>(0.758, 1.000) | 1.000<br>(0.800, 1.000) | 0.750<br>(0.583, 1.000) | 0.864<br>(0.773, 1.000) | G3WNV1;<br>G3WNV2 |
| <b>ACTR3</b>        | 0.900<br>(0.750, 1.000) | 0.700<br>(0.600, 1.000) | 1.000<br>(0.583, 1.000) | 0.864<br>(0.773, 1.000) | G3WIY5            |

\*Proteins blasted against the Tasmanian devil reference genome (GCA\_902635505.1 mSarHar1.11) using the online NCBI protein Basic Local Alignment Search Tool (BLAST).

**Supplementary table 3.** EV proteins accuracy for the diagnosis of DFTD in the validation cohort with an area under the curve (AUC)  $\geq 0.9$ . All numbers for AUC, sensitivity, specificity, and accuracy are in fractions. 95% confidence intervals.

| <b>Protein name</b> | <b>AUC</b>              | <b>Specificity</b>      | <b>Sensitivity</b>      | <b>Accuracy</b>         | <b>UniProt number</b> |
|---------------------|-------------------------|-------------------------|-------------------------|-------------------------|-----------------------|
| <b>CATH3</b>        | 0.925<br>(0.840, 0.989) | 0.941<br>(0.882, 1.000) | 0.879<br>(0.727, 0.97)  | 0.900<br>(0.820, 0.980) | G3W0S2                |
| <b>PFN1</b>         | 0.918<br>(0.804, 0.995) | 0.882<br>(0.765, 1.000) | 0.909<br>(0.788, 1.000) | 0.900<br>(0.820, 0.98)  | G3VU42                |
| <b>ILK</b>          | 0.914<br>(0.822, 0.980) | 0.824<br>(0.647, 1.000) | 0.848<br>(0.697, 1.000) | 0.840<br>(0.760, 0.960) | G3W679                |
| <b>LIMS1</b>        | 0.909<br>(0.818, 0.973) | 0.765<br>(0.646, 1.000) | 0.909<br>(0.636, 1.000) | 0.860<br>(0.740, 0.960) | G3VJH5                |

**Supplementary table 4.** Kendall correlation of proteins with tumour volumes. DFTD infected animals from the discovery and validation dataset (n=45). P values were adjusted by the Benjamini-Hochberg method.

| Protein name | Kendall's tau | Corrected P value | Uniprot number |
|--------------|---------------|-------------------|----------------|
| MYH10        | 0.42          | 0.001             | G3W344         |
| TGFBI        | 0.41          | 0.001             | G3VMG6         |
| CTGF         | 0.41          | 0.001             | G3WBU2         |
| GADPH        | 0.36          | 0.004             | G3WQA5         |
| HSPA5        | 0.36          | 0.004             | G3W4H8         |
| ANXA4        | 0.36          | 0.004             | G3WNV1;G3WNV2  |
| MYL6         | 0.35          | 0.006             | G3VPK8         |
| LOC100924827 | 0.34          | 0.006             | G3VT38         |
| MYH9         | 0.34          | 0.006             | G3W8S4         |
| ITGA2B       | 0.34          | 0.008             | G3WU27         |
| RAP1A        | 0.33          | 0.008             | G3WME1         |
| TNN          | 0.33          | 0.008             | G3WK59         |
| FGL1         | 0.33          | 0.008             | G3W2N2         |
| RHOA         | 0.33          | 0.008             | G3WUV1         |
| PPIA         | 0.33          | 0.008             | G3WXF8         |
| LOC105750812 | 0.32          | 0.010             | G3VPL9         |
| LOC100931899 | 0.31          | 0.012             | G3VBX5         |
| PTN          | 0.31          | 0.012             | G3VRT4; G3VRT5 |
| IGA*         | 0.30          | 0.017             | G3VS26         |
| ACTB         | 0.29          | 0.018             | G3WHH2; G3WP12 |
| TUBB2A       | 0.29          | 0.019             | G3WMM3         |
| YWHAQ        | 0.29          | 0.020             | G3VS43         |
| ANXA1        | 0.28          | 0.022             | G3W8D2         |
| C5           | 0.28          | 0.022             | G3WZ02         |
| LOC100932693 | -0.28         | 0.022             | G3WEF1         |
| DCN          | 0.27          | 0.029             | G3VVA7         |

|         |      |       |                |
|---------|------|-------|----------------|
| CCDC3   | 0.27 | 0.030 | G3WLM3         |
| DSTN    | 0.27 | 0.032 | G3W5M4         |
| LIMS1   | 0.27 | 0.032 | G3VJH5; G3VJH6 |
| SELP    | 0.27 | 0.032 | G3W7A0         |
| CFL1    | 0.26 | 0.034 | G3VHS2         |
| CAPZA2  | 0.26 | 0.035 | G3WVH2;        |
| CAPZB   | 0.26 | 0.037 | G3VTU6         |
| YWHAZ   | 0.26 | 0.037 | G3WHE0         |
| ARHGDIB | 0.26 | 0.039 | G3WV18         |

\*Proteins blasted against the Tasmanian devil reference genome (GCA\_902635505.1 mSarHar1.11) using the online NCBI protein Basic Local Alignment Search Tool (BLAST).
